# Supplementary material for: Carrier Screening is a Deficient Strategy for Determining Sperm Donor Eligibility and Reducing Risk of Disease in Recipient Children
Source: PubMed Central journal article supplement — Genet Test Mol Biomarkers. 2016 Jun 1;20(6):276–84. doi: 10.1089/gtmb.2016.0014 (PMC4892196; doi:10.1089/gtmb.2016.0014), 2016-06-01
Supplement: Supp_Fig1.pdf [file Supp_Fig1.pdf]

## Supplementary Data

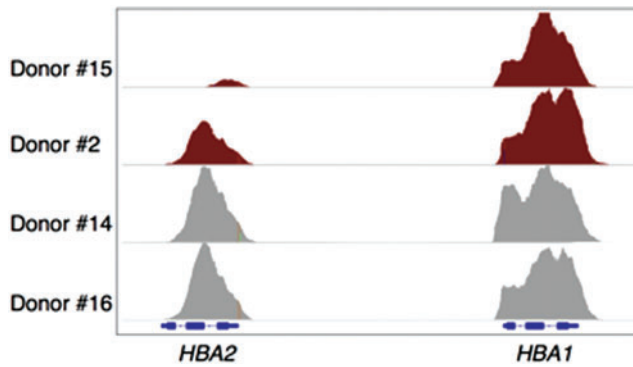

**SUPPLEMENTARY FIG. S1.** Visualization of NGS read counts over the alpha globin locus for four donors. IGV (Thorvaldsdóttir *et al.*, 2013) plots of sequence data are shown for two donors reported as alpha-thalassemia carriers (Nos. 15 and 2) and two donors reported as noncarriers (Nos. 14 and 16) by GSG. Each plot is calibrated according to maximum read counts over the *HBA1* gene. Visual inspection indicates a reduction in genomic copies of the *HBA2* gene for GSG-reported carriers and not for noncarriers. GSG, Good Start Genetics; IGV, Integrative Genomics Viewer; NGS, next-generation sequencing.
